# Supplementary material for: “We speak a topsy-turvy language”: Self-declared language purism versus language use among the speakers of Western Huasteca Nahuatl
Source: publisher site journal article supplement (doi:10.1515/ijsl-2024-0138), 2025-04-21

## ¡Bienvenidos/as y muchas gracias por su valiosa participación en el estudio!

Somos un grupo de investigadores e investigadoras afiliados a la Universidad de Varsovia en Polonia interesados en estudiar las minorías étnicas en Polonia y fuera de Polonia. En nuestra encuesta les vamos a preguntar sobre diferentes aspectos del uso del náhuatl y también haremos preguntas acerca de cómo se percibe a los grupos indígenas en México. Además les vamos a pedir su opinión sobre varios temas sociales. Queremos conocer su opinión y ver de que manera las preguntas están relacionadas entre sí. No existen respuestas buenas o malas. Lo importante es que sean verdaderas y sinceras.

No analizaremos los resultados de personas individuales, sólo las veremos de manera colectiva. Los resultados se usarán sólo con fines científicos. Las conclusiones de la investigación pueden ser útiles para fortalecer las iniciativas locales.

Para rellenar la encuesta necesitaremos 60 minutos, más o menos. Su participación en la encuesta es voluntaria y en cualquier momento puede interrumpir la encuesta.

Si tienen alguna pregunta o comentarios, favor de escribirlos en la sección de comentarios al final del formato de esta encuesta.

Garantizamos que la información divulgada en el estudio no se transferirá de ninguna forma a ninguna otra entidad, incluidas las autoridades mexicanas, las oficinas de migración y otras autoridades.

Las propiedades y el objetivo de este estudio se me han explicado de manera satisfactoria y acepto ser un participante en el estudio descrito anteriormente. Entiendo que, si así lo deseo, puedo cancelar mi participación en este estudio en cualquier momento y que si tengo preguntas o dudas sobre esta investigación, puedo ponerme en contacto con los investigadores escribiendo al correo electrónico: [lcure@al.uw.edu.pl](mailto:lcure@al.uw.edu.pl).

- ☐ Autorizo mi participación
- ☐ No autorizo mi participación

---

TEAM LCURE 2016-3/28

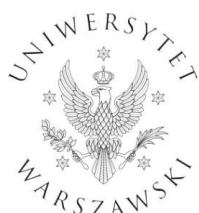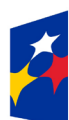

**Fundusze Europejskie**  
Inteligentny Rozwój

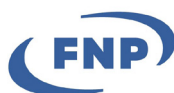

**Fundacja na rzecz Nauki Polskiej**

**Unia Europejska**  
Europejski Fundusz Rozwoju Regionalnego

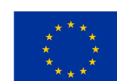

OBLIGACIÓN DE INFORMACIÓN BASADA EN EL ARTÍCULO 14 RGPD<sup>1</sup>:

### **1. El administrador de los datos**

El administrador o la entidad decisiva sobre cómo se usarán sus datos personales es la Universidad de Varsovia representada por el Rector con base en: ul. Krakowskie Przedmieście 26/28, 00-927 Warszawa, Polonia.

### **2. Inspector de Protección de Datos**

El Rector de la Universidad de Varsovia ha designado al Oficial de Protección de Datos (IOD) con quien puede contactar en asuntos relacionados con sus datos personales. Puede contactar al Inspector enviando un correo electrónico a: *iod@adm.uw.edu.pl*.

### **3. Los fines de procesamiento y la base legal para el procesamiento de datos personales**

Con su consentimiento, procesamos sus datos en términos de información de registro, estado de salud y vitalidad del lenguaje para fines de investigación. Puede retirar su consentimiento en cualquier momento enviando un correo electrónico a: *lcure@al.uw.edu.pl* o contactar directamente al entrevistador.

### **4. El periodo de almacenamiento de sus datos personales**

Sus datos personales estarán almacenados durante el periodo de la realización del estudio.

### **5. Destinatarios de sus datos**

Los destinatarios de sus datos son las entidades autorizadas por la ley.

### **6. Sus derechos de procesamiento**

Le garantizamos el cumplimiento de todos sus derechos derivados de RGPD: el derecho de acceder y rectificar datos y el derecho a eliminar o limitar el procesamiento, así como el derecho a oponerse.

### **7. La obligación de proporcionar datos y las consecuencias de no proporcionar datos**

Proporcionar sus datos es voluntario, pero si no los proporciona, no podrá participar en el estudio.

### **8. El derecho a presentar una queja al Presidente de la Oficina de Protección de Datos Personales**

Cuando piense que el procesamiento de sus datos personales viola las disposiciones del reglamento general sobre la protección de datos personales, tiene derecho a presentar una queja ante el Presidente de la Oficina de Protección de Datos Personales.

**¡Ahora ya podemos empezar!**

---

<sup>1</sup> Reglamento General de Protección de Datos - Reglamento (UE) 2016/679 del Parlamento Europeo y del Consejo, de 27 de abril de 2016, sobre la protección de las personas físicas en relación con el tratamiento de datos personales y la libre circulación de dichos datos y la derogación de la Directiva 95/46 / CE (Reglamento general sobre protección de datos).

**Para empezar le pedimos que proporcione información sobre usted.**

**¿Qué es su idioma materno?**

\_\_\_\_\_

**Género**

- ☐ Mujer
- ☐ Hombre
- ☐ Otro \_\_\_\_\_

**¿En qué año nació?** \_\_\_\_\_

**¿Usted se considera mexicano/a, indígena, nahua,....?**

- ☐ Indígena
- ☐ Nahua
- ☐ Mexicano
- ☐ Otro \_\_\_\_\_

**¿En qué idioma habla o hablaba con su padre? (puede marcar más que uno)**

- ☐ náhuatl o mexicano
- ☐ español
- ☐ otro \_\_\_\_\_

**¿En qué idioma habla o hablaba con su madre? (puede marcar más que uno)**

- ☐ náhuatl o mexicano
- ☐ español
- ☐ otro \_\_\_\_\_

**¿Habla alguna lengua indígena?**

- ☐ náhuatl o mexicano
- ☐ otra \_\_\_\_\_

**¿Cuál es su religión?**

- ☐ Costumbres/creencias tradicionales
- ☐ Católico
- ☐ Evangélico
- ☐ Testigo de Jehová
- ☐ Sin religión
- ☐ Otra iglesia/religión \_\_\_\_\_
- ☐ Prefiero no responder

**Lugar de residencia**

- ☐ Ciudad de más de 500.000 habitantes
- ☐ Ciudad de entre 100.000 y 500.000 habitantes
- ☐ Ciudad de entre 50.000 y 100.000 habitantes
- ☐ Ciudad de entre 20.000 y 50.000 habitantes
- ☐ Ciudad de menos de 20.000 habitantes
- ☐ Pueblo/cabecera municipal
- ☐ Comunidad de más de 1.000 habitantes
- ☐ Comunidad de entre 500 y 1.000 personas
- ☐ Comunidad de menos de 500 personas

**Cómo se llama su comunidad?**

\_\_\_\_\_

**Cómo se llama su municipio?**

\_\_\_\_\_

**Educación formal:**

- ☐ Ninguna  
☐ Preescolar  
☐ Escuela primaria  
    ¿Hasta qué año? \_\_\_\_\_  
☐ Escuela secundaria  
☐ Escuela preparatoria/Bachillerato  
☐ Normal básica  
☐ Estudios técnicos o comerciales con primaria terminada  
☐ Estudios técnicos o comerciales con secundaria terminada  
☐ Estudios técnicos o comerciales con preparatoria terminada  
☐ Normal de licenciatura  
☐ Licenciatura o profesional  
☐ Maestría  
☐ Doctorado

**Mi situación de empleo (puede escoger más de una opción)**

- ☐ Estoy empleado/a  
☐ Trabajo por lo menos una hora) al día en.....  
☐ Estoy buscando trabajo  
☐ Trabajo en campo/tengo mi huerta/milpa  
☐ Tengo mi propio negocio  
☐ Soy estudiante  
☐ No tengo trabajo  
☐ Soy pensionada(o) o jubilada(o)  
☐ Tengo licencia por enfermedad  
☐ Me dedico a los quehaceres de mi hogar  
☐ Tengo alguna limitación física o mental permanente que me impide trabajar  
☐ No trabajo por otras razones  
☐ Estoy en otra situación diferente a las anteriores

**¿Cómo ve la situación económica de su hogar?**

Muy mala                      Mala                      Promedia                      Buena                      Muy buena

**¿En cualquier tiempo su familia ha tenido problemas para pagar por:**

|                             | Nunca | A veces | Frecuente-<br>mente | Casi<br>siempre | Alguien<br>nos ayuda<br>(hijos,<br>parientes,<br>apoyo<br>federal,<br>otros) | No se<br>aplica | Prefiero<br>no<br>responder<br>a esta<br>pregunta |
|-----------------------------|-------|---------|---------------------|-----------------|------------------------------------------------------------------------------|-----------------|---------------------------------------------------|
| Mantenimiento de<br>la casa |       |         |                     |                 |                                                                              |                 |                                                   |

|                                                                                              | Nunca | A veces | Frecuente-<br>mente | Casi<br>siempre | Alguien<br>nos ayuda<br>(hijos,<br>parientes,<br>apoyo<br>federal,<br>otros) | No se<br>aplica | Prefiero<br>no<br>responder<br>a esta<br>pregunta |
|----------------------------------------------------------------------------------------------|-------|---------|---------------------|-----------------|------------------------------------------------------------------------------|-----------------|---------------------------------------------------|
| Transporte                                                                                   |       |         |                     |                 |                                                                              |                 |                                                   |
| Recibos<br>(por ejemplo por la<br>luz)                                                       |       |         |                     |                 |                                                                              |                 |                                                   |
| Comida                                                                                       |       |         |                     |                 |                                                                              |                 |                                                   |
| Cosas para niños<br>(por ejemplo ropa)                                                       |       |         |                     |                 |                                                                              |                 |                                                   |
| Gastos<br>relacionados con<br>la escuela (traje,<br>libretas, lapiceros,<br>clausuras, etc.) |       |         |                     |                 |                                                                              |                 |                                                   |

Muchas gracias por sus respuestas a las preguntas demográficas. Para empezar, les vamos a hacer unas preguntas sobre las personas indígenas y las personas no indígenas.

**Favor de marcar su respuesta en una escala de 1 al 5 en la que 1 - definitivamente personas indígenas y 5 - definitivamente no-indígenas ....**

|                                                                                                                         | 1<br>definitiva-<br>mente<br>personas<br>indígenas | 2<br>por lo<br>general<br>indígenas | 3<br>de manera<br>igual<br>indígenas y<br>no indígenas | 4<br>por lo general<br>no-indígenas | 5<br>definitivamente<br>no-indígenas |
|-------------------------------------------------------------------------------------------------------------------------|----------------------------------------------------|-------------------------------------|--------------------------------------------------------|-------------------------------------|--------------------------------------|
| ¿Quién tiene más influencia en la situación económica y los negocios en México?                                         |                                                    |                                     |                                                        |                                     |                                      |
| ¿Quién tiene más impacto en la política en México?                                                                      |                                                    |                                     |                                                        |                                     |                                      |
| ¿Quién es más rico?                                                                                                     |                                                    |                                     |                                                        |                                     |                                      |
| ¿De qué grupo salen más personas famosas como por ejemplo escritores/as, artistas, actores/actrices?                    |                                                    |                                     |                                                        |                                     |                                      |
| ¿De qué grupo salen más personas de tal profesiones como maestros/maestras, abogados/abogadas, doctores/doctoras, etc.? |                                                    |                                     |                                                        |                                     |                                      |
| ¿Quién es más respetado en México?                                                                                      |                                                    |                                     |                                                        |                                     |                                      |
| ¿Quién tiene más poder?                                                                                                 |                                                    |                                     |                                                        |                                     |                                      |
| ¿Quién tendrá más poder en 20 años?                                                                                     |                                                    |                                     |                                                        |                                     |                                      |

**¿Que tanto está de acuerdo con las siguientes afirmaciones? Le pedimos que conteste usando la escala de 1 a 5, en la que 1 - Muy en desacuerdo y 5 - Muy de acuerdo.**

|                                                        | 1<br>Muy en<br>desacuerdo | 2<br>Más o<br>menos en<br>desacuerdo | 3<br>No estoy<br>seguro/a | 4<br>Más o menos de<br>acuerdo | 5<br>Muy de<br>acuerdo |
|--------------------------------------------------------|---------------------------|--------------------------------------|---------------------------|--------------------------------|------------------------|
| La lengua náhuatl tiene una posición fuerte en México. |                           |                                      |                           |                                |                        |
| Se valora la lengua náhuatl en México.                 |                           |                                      |                           |                                |                        |

|                                                                             | 1<br>Muy en<br>desacuerdo | 2<br>Más o<br>menos en<br>desacuerdo | 3<br>No estoy<br>seguro/a | 4<br>Más o menos de<br>acuerdo | 5<br>Muy de<br>acuerdo |
|-----------------------------------------------------------------------------|---------------------------|--------------------------------------|---------------------------|--------------------------------|------------------------|
| La lengua náhuatl<br>tendrá una posición<br>fuerte en México en 20<br>años. |                           |                                      |                           |                                |                        |

**Favor de leer atentamente las siguientes declaraciones y marcar si está de acuerdo con ellas usando la escala de 1 a 5 en la que 1 - Muy en desacuerdo y 5 - Muy de acuerdo.**

|                                                                       | 1<br>Muy en<br>desacuerdo | 2<br>Más o<br>menos en<br>desacuerdo | 3<br>No estoy<br>seguro/a | 4<br>Más o menos de<br>acuerdo | 5<br>Muy de<br>acuerdo |
|-----------------------------------------------------------------------|---------------------------|--------------------------------------|---------------------------|--------------------------------|------------------------|
| Me preocupa el<br>futuro de las personas<br>indígenas                 |                           |                                      |                           |                                |                        |
| Siento que el futuro de<br>las personas indígenas<br>está en peligro. |                           |                                      |                           |                                |                        |
| Estoy preocupado/a<br>por el futuro de la<br>lengua náhuatl.          |                           |                                      |                           |                                |                        |
| Pienso que el futuro de<br>la lengua náhuatl está<br>en peligro.      |                           |                                      |                           |                                |                        |

**¿Cómo aprendió hablar el náhuatl? (Puede marcar más de una respuesta)**

- ☐ No lo hablo  
☐ De mi mamá  
☐ De mi papá  
☐ De mis abuelos o los demás miembros de familia que no sean mis papás  
☐ De mis amigos/conocidos o de miembros de mi comunidad que hablan el náhuatl  
☐ En la escuela primaria/secundaria/prepa etc.  
☐ En la universidad  
☐ En la escuela normal  
☐ En un curso de este idioma  
☐ En otra manera... (favor de especificar) \_\_\_\_\_

**¿En cuál situación usa usted español y en cuál usa náhuatl?**

|                    | Solamente<br>en náhuatl | Principal-<br>mente en<br>náhuatl | Con más<br>frecuencia en<br>náhuatl que<br>en español | Con la misma<br>frecuencia en<br>náhuatl como<br>en español | Con más<br>frecuencia en<br>español | Principal-<br>mente en<br>español | Solamente en<br>español | En otra<br>lengua |
|--------------------|-------------------------|-----------------------------------|-------------------------------------------------------|-------------------------------------------------------------|-------------------------------------|-----------------------------------|-------------------------|-------------------|
| Con mis<br>papás   |                         |                                   |                                                       |                                                             |                                     |                                   |                         |                   |
| Con mis<br>abuelos |                         |                                   |                                                       |                                                             |                                     |                                   |                         |                   |
| Con mis hijos      |                         |                                   |                                                       |                                                             |                                     |                                   |                         |                   |

|                                                                                       | Solamente en náhuatl | Principalmente en náhuatl | Con más frecuencia en náhuatl que en español | Con la misma frecuencia en náhuatl como en español | Con más frecuencia en español | Principalmente en español | Solamente en español | En otra lengua |
|---------------------------------------------------------------------------------------|----------------------|---------------------------|----------------------------------------------|----------------------------------------------------|-------------------------------|---------------------------|----------------------|----------------|
| Con mis amigos/ conocidos                                                             |                      |                           |                                              |                                                    |                               |                           |                      |                |
| Con vecinos                                                                           |                      |                           |                                              |                                                    |                               |                           |                      |                |
| Con autoridades municipales                                                           |                      |                           |                                              |                                                    |                               |                           |                      |                |
| Con autoridades ejidales o comunitarias                                               |                      |                           |                                              |                                                    |                               |                           |                      |                |
| En un consultorio médico                                                              |                      |                           |                                              |                                                    |                               |                           |                      |                |
| Con un curandero/a, huesero/a o partera/o local                                       |                      |                           |                                              |                                                    |                               |                           |                      |                |
| Durante los eventos culturales (conciertos, teatro, festivales) en el pueblo o ciudad |                      |                           |                                              |                                                    |                               |                           |                      |                |
| Fiestas familiares                                                                    |                      |                           |                                              |                                                    |                               |                           |                      |                |
| En la iglesia                                                                         |                      |                           |                                              |                                                    |                               |                           |                      |                |
| En ceremonias tradicionales / practicando costumbre                                   |                      |                           |                                              |                                                    |                               |                           |                      |                |
| En el internet o redes sociales, como el Facebook                                     |                      |                           |                                              |                                                    |                               |                           |                      |                |

**Favor de leer atentamente las siguientes preguntas y responder a ellas usando la escala de 1 a 5 en la que 1 - nunca, y 5 - muy a menudo**

|                                                                                                                          | 1<br>nunca | 2<br>raras veces | 3<br>de vez en cuando | 4<br>a menudo | 5<br>muy a menudo |
|--------------------------------------------------------------------------------------------------------------------------|------------|------------------|-----------------------|---------------|-------------------|
| Cuando era un niño/una niña sus maestros/as u otras personas, ¿les desanimaba a hablar el náhuatl a usted o a sus papás? |            |                  |                       |               |                   |
| Cuando era un niño/una niña sus papás ¿les desanimaban a hablar el náhuatl?                                              |            |                  |                       |               |                   |



|                                                                                      | 1<br>nunca | 2<br>raras veces | 3<br>de vez en<br>cuando | 4<br>a menudo | 5<br>muy a<br>menudo |
|--------------------------------------------------------------------------------------|------------|------------------|--------------------------|---------------|----------------------|
| Cuando fue un niño/niña, ¿sus maestros le decían que hablar el náhuatl era malo?     |            |                  |                          |               |                      |
| Le pasó que alguien le dijera que no se debe hablar en náhuatl?                      |            |                  |                          |               |                      |
| Hoy en día algunas personas o instituciones ¿dicen que no hay que hablar el náhuatl? |            |                  |                          |               |                      |

**¿Con qué frecuencia le sucedían en el pasado o en la actualidad las siguientes situaciones?**

**en el pasado**

|                                                                                                                                                     | 1<br>nunca | 2<br>raras veces | 3<br>de vez en<br>cuando | 4<br>a menudo | 5<br>muy a<br>menudo | No se<br>aplica |
|-----------------------------------------------------------------------------------------------------------------------------------------------------|------------|------------------|--------------------------|---------------|----------------------|-----------------|
| No uso el náhuatl en el transporte público u otros lugares públicos cuando platico con mis amigos o conocidos.                                      |            |                  |                          |               |                      |                 |
| Prefiero no usar el náhuatl cuando estoy con personas no indígenas.                                                                                 |            |                  |                          |               |                      |                 |
| Prefiero no usar el náhuatl cuando estoy con personas que no lo hablan aunque sean indígenas.                                                       |            |                  |                          |               |                      |                 |
| Cuando estoy en un lugar público o transporte público evito platicar por teléfono en náhuatl para que los demás no me escuchen hablando el náhuatl. |            |                  |                          |               |                      |                 |
| Prefiero no ir al médico porque temo no va a entender mi español.                                                                                   |            |                  |                          |               |                      |                 |
| Prefiero no hablar el náhuatl para no parecer una persona no educada.                                                                               |            |                  |                          |               |                      |                 |
| Evito hablar el náhuatl para que las personas no sepan que soy indígena.                                                                            |            |                  |                          |               |                      |                 |
| Me ha pasado que otras personas se reían o se burlaban de mí por mi lengua materna (el náhuatl).                                                    |            |                  |                          |               |                      |                 |
| He experimentado violencia por hablar el náhuatl.                                                                                                   |            |                  |                          |               |                      |                 |
| Me han tratado mal por hablar el náhuatl.                                                                                                           |            |                  |                          |               |                      |                 |
| Me siento excluido/a de las conversaciones por no hablar bien el náhuatl.                                                                           |            |                  |                          |               |                      |                 |
| Evito hablar el náhuatl con otros nahuahablantes porque temo que no lo hablo suficientemente bien.                                                  |            |                  |                          |               |                      |                 |

|                                                                                               | 1<br>nunca | 2<br>raras veces | 3<br>de vez en<br>cuando | 4<br>a menudo | 5<br>muy a<br>menudo | No se<br>aplica |
|-----------------------------------------------------------------------------------------------|------------|------------------|--------------------------|---------------|----------------------|-----------------|
| No me puedo convencer para hablar el náhuatl a los hijos (míos y otros).                      |            |                  |                          |               |                      |                 |
| Me ha pasado que alguien no quiso traducir alguna información al español que le había pedido. |            |                  |                          |               |                      |                 |
| Me siento excluido de algunas conversaciones o pláticas porque no hablo bien el español.      |            |                  |                          |               |                      |                 |

#### ahora

|                                                                                                                                                     | 1<br>nunca | 2<br>raras veces | 3<br>de vez en<br>cuando | 4<br>a menudo | 5<br>muy a<br>menudo | No se<br>aplica |
|-----------------------------------------------------------------------------------------------------------------------------------------------------|------------|------------------|--------------------------|---------------|----------------------|-----------------|
| No uso el náhuatl en el transporte público u otros lugares públicos cuando platico con mis amigos o conocidos.                                      |            |                  |                          |               |                      |                 |
| Prefiero no usar el náhuatl cuando estoy con personas no indígenas.                                                                                 |            |                  |                          |               |                      |                 |
| Prefiero no usar el náhuatl cuando estoy con personas que no lo hablan aunque sean indígenas.                                                       |            |                  |                          |               |                      |                 |
| Cuando estoy en un lugar público o transporte público evito platicar por teléfono en náhuatl para que los demás no me escuchen hablando el náhuatl. |            |                  |                          |               |                      |                 |
| Prefiero no ir al médico porque temo que no me va a entender.                                                                                       |            |                  |                          |               |                      |                 |
| Prefiero no hablar el náhuatl para no parecer una persona no educada.                                                                               |            |                  |                          |               |                      |                 |
| Evito hablar el náhuatl para que las personas no sepan que soy indígena.                                                                            |            |                  |                          |               |                      |                 |
| Me ha pasado que otras personas se reían o se burlaban de mí por mi lengua materna (el náhuatl).                                                    |            |                  |                          |               |                      |                 |
| He experimentado violencia por hablar el náhuatl.                                                                                                   |            |                  |                          |               |                      |                 |
| Me han tratado mal por hablar el náhuatl.                                                                                                           |            |                  |                          |               |                      |                 |
| Me siento excluido/a de las conversaciones por no hablar bien el náhuatl.                                                                           |            |                  |                          |               |                      |                 |
| Evito hablar el náhuatl con otros nahuahablantes porque temo que no lo hablo suficientemente bien.                                                  |            |                  |                          |               |                      |                 |
| No me puedo convencer para hablar el náhuatl a los hijos (míos y otros).                                                                            |            |                  |                          |               |                      |                 |

|                                                                                               | 1<br>nunca | 2<br>raras veces | 3<br>de vez en<br>cuando | 4<br>a menudo | 5<br>muy a<br>menudo | No se<br>aplica |
|-----------------------------------------------------------------------------------------------|------------|------------------|--------------------------|---------------|----------------------|-----------------|
| Me ha pasado que alguien no quiso traducir alguna información al español que le había pedido. |            |                  |                          |               |                      |                 |
| Me siento excluido de algunas conversaciones o pláticas porque no hablo bien el español.      |            |                  |                          |               |                      |                 |

**Favor de contestar las siguientes preguntas usando la escala de 1 a 5 en la que: 1 - Muy en desacuerdo y 5 - Muy de acuerdo**

|                                                                                                                   | 1<br>Muy en<br>desacuerdo | 2<br>Más o<br>menos en<br>desacuerdo | 3<br>No estoy<br>seguro/a | 4<br>Más o<br>menos de<br>acuerdo | 5<br>Muy de<br>acuerdo |
|-------------------------------------------------------------------------------------------------------------------|---------------------------|--------------------------------------|---------------------------|-----------------------------------|------------------------|
| Me he sentido/a discriminado/a por no-indígenas a causa de ser indígena.                                          |                           |                                      |                           |                                   |                        |
| He sido tratado/a groseramente o injustamente a causa de ser indígena.                                            |                           |                                      |                           |                                   |                        |
| Siento que la gente frecuentemente ve mi comportamiento de acuerdo a los prejuicios sobre las personas indígenas. |                           |                                      |                           |                                   |                        |
| Por mi origen indígena, tengo que trabajar más duro que muchos no-indígenas (mexicanos).                          |                           |                                      |                           |                                   |                        |
| Siento la presión de que lo que "yo" hago sea visto por los demás como algo típico de solo gente indígena.        |                           |                                      |                           |                                   |                        |
| Cuando busco trabajo, creo que mi origen indígena es una limitación.                                              |                           |                                      |                           |                                   |                        |
| Es difícil para mí funcionar bien en el trabajo porque mi español es limitado.                                    |                           |                                      |                           |                                   |                        |

**¿Tiene los siguientes sentimientos cuando habla en náhuatl?**

**Favor de contestar usando la escala de 1 a 5 en la que 1 - nunca y 5 - muy a menudo (6 - no se aplica).**

**Cuando hablo náhuatl siento...**

|                       | 1<br>nunca | 2<br>raras veces | 3<br>de vez en<br>cuando | 4<br>a menudo | 5<br>muy a<br>menudo | 6<br>No se aplica |
|-----------------------|------------|------------------|--------------------------|---------------|----------------------|-------------------|
| Me da pena            |            |                  |                          |               |                      |                   |
| Me siento orgulloso/a |            |                  |                          |               |                      |                   |
| Me siento culpable    |            |                  |                          |               |                      |                   |
| Siento tristeza       |            |                  |                          |               |                      |                   |
| Vergüenza             |            |                  |                          |               |                      |                   |
| Miedo                 |            |                  |                          |               |                      |                   |

|                                     | 1<br>nunca | 2<br>raras veces | 3<br>de vez en<br>cuando | 4<br>a menudo | 5<br>muy a<br>menudo | 6<br>No se aplica |
|-------------------------------------|------------|------------------|--------------------------|---------------|----------------------|-------------------|
| Alegría                             |            |                  |                          |               |                      |                   |
| Me siento<br>emocion-<br>ada/o      |            |                  |                          |               |                      |                   |
| Calma                               |            |                  |                          |               |                      |                   |
| Me siento<br>contento               |            |                  |                          |               |                      |                   |
| Me siento<br>normal                 |            |                  |                          |               |                      |                   |
| Conección<br>con los<br>antepasados |            |                  |                          |               |                      |                   |

**¿Qué frases le gustan más?**

|                                                     |   |                                                      |
|-----------------------------------------------------|---|------------------------------------------------------|
| Nopa notlal nicpiya campanechca caltlamachtilli.    | 1 | Nopa notlal nicpiya campanechca escuela.             |
| Ni cihuatl nochipa nehnemi ihuaya ichichi yayahuic. | 2 | Ni cihuatl nochipa caminara ihuaya ichichi yayahuic. |
| Nochi tonalli nitlacualchihua pan nochan.           | 3 | Nochi tonalli nicchihua tlacualli pan nochan.        |
| Na nicnequi niccahuilia pilquentzin tomin.          | 4 | Na nicnequi niccahua pilquentzin tomin para ya.      |
| Nicochqui cuatitlan.                                | 5 | Nicochqui pan ce itlan ce cuahuatl.                  |
| Yalhuaya nechtlaxtlahui ce peso Hipolito.           | 6 | Yalhuaya Hipolito nechtlaxtlahui ce peso.            |

|   | Definitivamente<br>ésta a la<br>izquierda | Me gusta un poco<br>más ésta a la<br>izquierda | Me gustan ambas | Me gusta un poco<br>más ésta a la<br>derecha | Definitivamente ésta<br>a la derecha |
|---|-------------------------------------------|------------------------------------------------|-----------------|----------------------------------------------|--------------------------------------|
| 1 |                                           |                                                |                 |                                              |                                      |
| 2 |                                           |                                                |                 |                                              |                                      |
| 3 |                                           |                                                |                 |                                              |                                      |
| 4 |                                           |                                                |                 |                                              |                                      |
| 5 |                                           |                                                |                 |                                              |                                      |
| 6 |                                           |                                                |                 |                                              |                                      |

Ahora le pedimos que marque si está de acuerdo con las siguientes opiniones, en la escala de 1 a 5 en la que 1 - Muy en desacuerdo y 5 - Muy de acuerdo.

|                                                             | 1<br>Muy en<br>desacuerdo | 2<br>Más o menos<br>en desacuerdo | 3<br>No estoy<br>seguro/a | 4<br>Más o menos de<br>acuerdo | 5<br>Muy de acuerdo |
|-------------------------------------------------------------|---------------------------|-----------------------------------|---------------------------|--------------------------------|---------------------|
| Me agrada que<br>el náhuatl agarra<br>palabras del español. |                           |                                   |                           |                                |                     |

|                                                                                         | 1<br>Muy en<br>desacuerdo | 2<br>Más o menos<br>en desacuerdo | 3<br>No estoy<br>seguro/a | 4<br>Más o menos de<br>acuerdo | 5<br>Muy de acuerdo |
|-----------------------------------------------------------------------------------------|---------------------------|-----------------------------------|---------------------------|--------------------------------|---------------------|
| No es bueno que haya tantas palabras del español en el náhuatl pero no hay otra opción. |                           |                                   |                           |                                |                     |
| Las palabras del español enriquecen el náhuatl.                                         |                           |                                   |                           |                                |                     |
| Hay que evitar el uso de palabras del español en el náhuatl.                            |                           |                                   |                           |                                |                     |

**¿Está de acuerdo con las siguientes declaraciones?**

|                                                                                                   | 1<br>Muy en<br>desacuerdo | 2<br>Más o<br>menos en<br>desacuerdo | 3<br>No estoy<br>seguro/a | 4<br>Más o menos de<br>acuerdo | 5<br>Muy de acuerdo |
|---------------------------------------------------------------------------------------------------|---------------------------|--------------------------------------|---------------------------|--------------------------------|---------------------|
| El náhuatl es un dialecto.                                                                        |                           |                                      |                           |                                |                     |
| El náhuatl es una lengua tal como español o inglés.                                               |                           |                                      |                           |                                |                     |
| El náhuatl no es puro porque está mezclado con español.                                           |                           |                                      |                           |                                |                     |
| No es posible expresar todo en el náhuatl de manera fácil o adecuada.                             |                           |                                      |                           |                                |                     |
| Las personas que hablan náhuatl deberían más bien usar el español para comunicarse con los demás. |                           |                                      |                           |                                |                     |
| El náhuatl se debería usar en más áreas de la vida porque lo necesitamos.                         |                           |                                      |                           |                                |                     |

**¿Tiene hijos en la edad escolar que hablan náhuatl?**

- ☐ Sí  
☐ No

si la respuesta a la pregunta previa es sí:

**¿Está de acuerdo con las siguientes opiniones? (conteste usando la escala de 1 a 5)**

**Por hablar el náhuatl...**

|                                                                           | 1<br>definitiva-<br>mente no | 2<br>probable-<br>mente no | 3<br>difícil decir | 4<br>probable-<br>mente sí | 5<br>definitiva-<br>mente sí |
|---------------------------------------------------------------------------|------------------------------|----------------------------|--------------------|----------------------------|------------------------------|
| Son discriminados o se burlan de ellos.                                   |                              |                            |                    |                            |                              |
| Tienen problemas en la escuela.                                           |                              |                            |                    |                            |                              |
| Tienen problema para hablar correctamente el español.                     |                              |                            |                    |                            |                              |
| Tienen problema para aprender el inglés.                                  |                              |                            |                    |                            |                              |
| No les gusta hablar el náhuatl o ellos mismos rechazan hablar el náhuatl. |                              |                            |                    |                            |                              |
| No van a poder estudiar o trabajar fuera de su comunidad.                 |                              |                            |                    |                            |                              |
| Están haciendo algo natural y normal.                                     |                              |                            |                    |                            |                              |

si la respuesta a la pregunta previa es no:

**Por favor imagine la situación en la que tuviera hijos en la edad escolar que hablaran el náhuatl.**

**¿Está de acuerdo con las siguientes opiniones? (conteste usando la escala de 1 a 5)**

**Si tuviera hijos que hablaran el náhuatl, entonces...**

|                                                      | 1<br>definitiva-<br>mente no | 2<br>probable-<br>mente no | 3<br>difícil decir | 4<br>probable-<br>mente sí | 5<br>definitiva-<br>mente sí |
|------------------------------------------------------|------------------------------|----------------------------|--------------------|----------------------------|------------------------------|
| Serían discriminados o se burlarían de ellos/as.     |                              |                            |                    |                            |                              |
| Tendrían problemas en la escuela.                    |                              |                            |                    |                            |                              |
| Tendrían problema hablando correctamente el español. |                              |                            |                    |                            |                              |
| Tendrían problema aprendiendo el inglés.             |                              |                            |                    |                            |                              |

|                                                                                    | 1<br>definitiva-<br>mente no | 2<br>probable-<br>mente no | 3<br>difícil decir | 4<br>probable-<br>mente sí | 5<br>definitiva-<br>mente sí |
|------------------------------------------------------------------------------------|------------------------------|----------------------------|--------------------|----------------------------|------------------------------|
| No les gustaría hablar el náhuatl o ellos/as mismos rechazarían hablar el náhuatl. |                              |                            |                    |                            |                              |
| No podrían estudiar o trabajar fuera de su comunidad.                              |                              |                            |                    |                            |                              |
| Estarían haciendo algo natural y normal.                                           |                              |                            |                    |                            |                              |

**¿Qué opina sobre el papel del náhuatl en el mercado de trabajo? ¿Opina que el conocimiento del náhuatl ayuda a encontrar empleo o, al contrario, lo impide? (conteste usando la escala de 1 a 5, en la que 1 - definitivamente lo impide y 5 - definitivamente ayuda.**

|                                                                                 | 1<br>definitiva-<br>mente lo<br>impide | 2<br>lo impide más | 3<br>no importa | 4<br>ayuda más | 5<br>definitiva-<br>mente ayuda |
|---------------------------------------------------------------------------------|----------------------------------------|--------------------|-----------------|----------------|---------------------------------|
| ¿El conocimiento del náhuatl ayuda o impide encontrar trabajo?                  |                                        |                    |                 |                |                                 |
| ¿El conocimiento del náhuatl ayuda o impide ganar más dinero?                   |                                        |                    |                 |                |                                 |
| ¿El conocimiento del náhuatl ayuda o impide desarrollar la carrera profesional? |                                        |                    |                 |                |                                 |
| ¿El conocimiento del náhuatl ayuda o impide cambiar el empleo [para uno mejor]? |                                        |                    |                 |                |                                 |

**Favor de juzgar en la escala de 1 a 5 su conocimiento del náhuatl y el español.**

|                    | 1<br>No (no lo<br>hablo o no<br>lo escribo) | 2<br>Casi no | 3<br>Poco | 4<br>Regular | 5<br>Bien | 6<br>Muy bien |
|--------------------|---------------------------------------------|--------------|-----------|--------------|-----------|---------------|
| Hablo en náhuatl   |                                             |              |           |              |           |               |
| Hablo en español   |                                             |              |           |              |           |               |
| Escribo en náhuatl |                                             |              |           |              |           |               |
| Escribo en español |                                             |              |           |              |           |               |

|                                    | <b>1</b><br>muy difícil | <b>2</b><br>difícil | <b>3</b><br>regular | <b>4</b><br>fácil | <b>5</b><br>muy fácil | <b>6</b><br>no se aplica |
|------------------------------------|-------------------------|---------------------|---------------------|-------------------|-----------------------|--------------------------|
| Cuando hablo el náhuatl eso es.... |                         |                     |                     |                   |                       |                          |
| Cuando hablo el español eso es.... |                         |                     |                     |                   |                       |                          |



Llegamos a la mitad de la encuesta. Muchas gracias otra vez por su participación. Entendemos que ya hemos preguntado sobre bastantes cosas y por eso puede sentirse un poco cansado/a. Es muy importante que las preguntas sean contestadas por la mayor cantidad de personas. Las respuestas de usted nos apoyarán a crear otras más cortas entrevistas e invitar aún más personas para participar en ellas. Si necesita un descanso, podemos parar acá por unos 5 minutos y después de un receso regresamos a las preguntas. Si se siente bien, podemos continuar con el cuestionario.

Favor de pensar en algún acto doloroso o injusticia que haya vivido en el pasado como persona indígena.

**Pensando en ese acto o evento, ¿Con qué frecuencia experimentó los siguientes sentimientos o se comportó de la siguiente manera?**

|                                                                                                                              | 1<br>Nunca | 2<br>Pocas veces | 3<br>De vez en cuando | 4<br>Frecuentemente |
|------------------------------------------------------------------------------------------------------------------------------|------------|------------------|-----------------------|---------------------|
| Regresan las memorias del daño sufrido.                                                                                      |            |                  |                       |                     |
| Tengo sentimiento de estar viviendo lo mismo otra vez.                                                                       |            |                  |                       |                     |
| Las memorias de lo que pasó regresan en mis sueños.                                                                          |            |                  |                       |                     |
| Tengo respuestas emocionales o mi cuerpo reacciona de alguna manera cuando me acuerdo de los daños sufridos/ de lo que pasó. |            |                  |                       |                     |
| Evito hacer cosas que me acuerden de lo que pasó.                                                                            |            |                  |                       |                     |
| Evito pensamientos y sentimientos que me acordarían de lo que pasó.                                                          |            |                  |                       |                     |
| Me siento agitado/a, es muy fácil espantarme.                                                                                |            |                  |                       |                     |
| Siempre estoy alerta/a.                                                                                                      |            |                  |                       |                     |

**Por favor marque en la escala en que grado esta de acuerdo con las afirmaciones abajo.**

|                                                    | 1<br>Muy en desacuerdo | 2<br>Más o menos en desacuerdo | 3<br>No estoy seguro/a | 4<br>Más o menos de acuerdo | 5<br>Muy de acuerdo |
|----------------------------------------------------|------------------------|--------------------------------|------------------------|-----------------------------|---------------------|
| Tengo mucho en común con otras personas indígenas. |                        |                                |                        |                             |                     |
| Siento un vínculo con otras personas indígenas.    |                        |                                |                        |                             |                     |

|                                                                                                    | 1<br>Muy en<br>desacuerdo | 2<br>Más o menos<br>en desacuerdo | 3<br>No estoy<br>seguro/a | 4<br>Más o menos<br>de acuerdo | 5<br>Muy de acuerdo |
|----------------------------------------------------------------------------------------------------|---------------------------|-----------------------------------|---------------------------|--------------------------------|---------------------|
| Es algo difícil para mi tener un vínculo con otras personas indígenas.                             |                           |                                   |                           |                                |                     |
| No me siento conectado con otras personas indígenas.                                               |                           |                                   |                           |                                |                     |
| Muy a menudo pienso en el hecho de que soy un indígena.                                            |                           |                                   |                           |                                |                     |
| En general, el hecho de que soy una indígena no tiene mucho que ver con quién soy/quién me siento. |                           |                                   |                           |                                |                     |
| En general, ser una persona indígena es una parte muy importante de quién soy.                     |                           |                                   |                           |                                |                     |
| En realidad, no pienso mucho en el hecho de que soy una persona indígena.                          |                           |                                   |                           |                                |                     |
| En general, me siento feliz porque soy una persona indígena.                                       |                           |                                   |                           |                                |                     |
| Muy a menudo me da pena ser una persona indígena.                                                  |                           |                                   |                           |                                |                     |
| No me siento bien con el hecho de que soy una persona indígena.                                    |                           |                                   |                           |                                |                     |
| En general, me siento bien cuando pienso en mi mismo/a como una persona indígena.                  |                           |                                   |                           |                                |                     |

Nos interesa qué siente acerca de las personas y los lugares asociados con su origen. Favor de contestar usando la escala de 1 a 5, en la que 1 - definitivamente no y 5 - definitivamente sí.

|                                                                                                 | 1<br>definitiva-<br>mente no | 2 | 3 | 4 | 5<br>definitiva-<br>mente sí |
|-------------------------------------------------------------------------------------------------|------------------------------|---|---|---|------------------------------|
| Cuando digo 'nosotros' pienso en las personas indígenas que viven en las comunidades indígenas. |                              |   |   |   |                              |

|                                                                                                                                                    | 1<br>definitiva-<br>mente no | 2 | 3 | 4 | 5<br>definitiva-<br>mente sí |
|----------------------------------------------------------------------------------------------------------------------------------------------------|------------------------------|---|---|---|------------------------------|
| Cuando digo 'nosotros' pienso en las personas indígenas independientemente de dónde viven.                                                         |                              |   |   |   |                              |
| Cuando digo 'nosotros' pienso en las personas indígenas independientemente de su origen.                                                           |                              |   |   |   |                              |
| Para mi es muy importante mi origen indígena y ser mexicana/o no tiene importancia.                                                                |                              |   |   |   |                              |
| Para mi es muy importante ser un mexicano/mexicana y ser de origen indígena no es tan importante.                                                  |                              |   |   |   |                              |
| Hay situaciones en las que me siento más una persona del origen indígena que un/a mexicano/a .                                                     |                              |   |   |   |                              |
| Hay situaciones en las que me siento más mexicano/a que indígena.                                                                                  |                              |   |   |   |                              |
| El hecho de que si me siento más indígena o mexicano/depende del lugar donde estoy (si estoy en mi comunidad/en una zona indígena o en la ciudad). |                              |   |   |   |                              |
| A veces me siento más un/a mexicano/a, a veces más indígena.                                                                                       |                              |   |   |   |                              |
| Todos somos seres humanos así que no tiene importancia si soy una persona indígena o un/a mexicano/a.                                              |                              |   |   |   |                              |
| Cuando digo 'nosotros' pienso en todas las personas de origen indígena y también los mexicanos no indígenas.                                       |                              |   |   |   |                              |

Les damos las gracias por responder a las preguntas arriba. Ahora vamos a pasar a otro tipo de cuestiones y le vamos a preguntar sobre su salud.

**Durante las últimas 2 semanas, ¿qué tan seguido le han afectado cualquiera de los siguientes problemas?**

|                                                                        | 1<br>Nunca | 2<br>Varios días | 3<br>Más de la<br>mitad de los<br>días | 4<br>Casi todos los<br>días |
|------------------------------------------------------------------------|------------|------------------|----------------------------------------|-----------------------------|
| Poco interés o placer en hacer las cosas                               |            |                  |                                        |                             |
| Se ha sentido decaído(a), deprimido(a), o sin esperanzas               |            |                  |                                        |                             |
| Dificultad para dormir o permanecer dormido(a), o ha dormido demasiado |            |                  |                                        |                             |

|                                                                                                                                                                                                 | 1<br>Nunca | 2<br>Varios días | 3<br>Más de la<br>mitad de los<br>días | 4<br>Casi todos los<br>días |
|-------------------------------------------------------------------------------------------------------------------------------------------------------------------------------------------------|------------|------------------|----------------------------------------|-----------------------------|
| Se ha sentido cansado(a) o con poca energía                                                                                                                                                     |            |                  |                                        |                             |
| Con poco apetito o ha comido en exceso                                                                                                                                                          |            |                  |                                        |                             |
| Se ha sentido mal con usted mismo(a) – o que es un fracaso o que ha quedado mal con usted mismo(a) o con su familia.                                                                            |            |                  |                                        |                             |
| Ha tenido dificultad para concentrarse en cosas tales como leer el periódico o ver televisión.                                                                                                  |            |                  |                                        |                             |
| Ha estado moviéndose o hablando tan lento que otras personas podrían notarlo?, o por el contrario – ha estado tan inquieto(a) o emocionado(a), que ha estado moviéndose mucho más de lo normal. |            |                  |                                        |                             |
| Ha pensado que estaría mejor muerto(a) o se le ha ocurrido lastimarse de alguna manera.                                                                                                         |            |                  |                                        |                             |

**En general, puedo decir que mi estado de salud es:**

|      |         |       |           |           |
|------|---------|-------|-----------|-----------|
| 1    | 2       | 3     | 4         | 5         |
| Malo | Regular | Bueno | Muy bueno | Excelente |

**Las siguientes preguntas se refieren a actividades o cosas que usted podría hacer en un día normal. Su salud actual, ¿le limita para hacer esas actividades o cosas? Si es así, ¿cuánto?**

|                                                                                                                                       | 1<br>Sí, me limita mucho | 2<br>Sí, me limita un poco | 3<br>No, no me limita nada |
|---------------------------------------------------------------------------------------------------------------------------------------|--------------------------|----------------------------|----------------------------|
| Esfuerzos moderados, como mover una mesa, limpiar la casa, hacer pequeños trabajos en el jardín o en el campo o caminar más de 1 hora |                          |                            |                            |
| Ir andando camino arriba.                                                                                                             |                          |                            |                            |

**Durante las 4 últimas semanas, ¿ha tenido alguno de los siguientes problemas en su trabajo o en sus actividades cotidianas, a causa de su salud física?**

|                                              | 1<br>Sí | 2<br>No |
|----------------------------------------------|---------|---------|
| ¿Hizo menos de lo que hubiera querido hacer? |         |         |

|                                                                                        | 1<br>Sí | 2<br>No |
|----------------------------------------------------------------------------------------|---------|---------|
| ¿Tuvo que dejar de hacer algunas tareas en su trabajo o en sus actividades cotidianas? |         |         |

**Durante las 4 últimas semanas, ¿ha tenido alguno de los siguientes problemas en su trabajo o en sus actividades cotidianas, a causa de algún problema emocional (como estar triste, deprimido, o nervioso)?**

|                                                                                                                      | 1<br>Sí | 2<br>No |
|----------------------------------------------------------------------------------------------------------------------|---------|---------|
| ¿Hizo menos de lo que hubiera querido hacer, por algún problema emocional?                                           |         |         |
| ¿No hizo su trabajo o sus actividades cotidianas tan cuidadosamente como de costumbre, por algún problema emocional? |         |         |

**Durante las 4 últimas semanas, ¿hasta qué punto el dolor le ha dificultado su trabajo habitual (incluido el trabajo fuera de casa y las tareas domésticas)?**

Nada                      Un poco                      Regular                      Bastante                      Mucho

**Las preguntas que siguen se refieren a cómo se ha sentido y cómo le han ido las cosas durante las 4 últimas semanas. En cada pregunta responda lo que se parezca más a cómo se ha sentido usted. Durante las 4 últimas semanas ¿cuánto tiempo...**

|                                   | 1<br>Nunca | 2<br>Sólo alguna vez | 3<br>Algunas veces | 4<br>Muchas veces | 5<br>Casi siempre | 6<br>Siempre |
|-----------------------------------|------------|----------------------|--------------------|-------------------|-------------------|--------------|
| ...se sintió calmado y tranquilo? |            |                      |                    |                   |                   |              |
| ...tuvo mucha energía?            |            |                      |                    |                   |                   |              |
| ...se sintió desanimado y triste? |            |                      |                    |                   |                   |              |

**Durante las 4 últimas semanas, ¿con qué frecuencia la salud física o los problemas emocionales le han dificultado sus actividades sociales (como visitar a los amigos o familiares)?**

Nunca                      Raras veces                      De vez en cuando                      A menudo                      Muy a menudo

En la sección de abajo están unas declaraciones que tienen que ver con su manera de verse a sí mismo/a/. Favor de contestar indicando si está o no está de acuerdo con cada uno de estas declaraciones usando la escala de 1 a 4, en la que 1 - definitivamente en desacuerdo, 4 - definitivamente de acuerdo). Favor de indicar lo que realmente piensa.

|                                                                                      | 1<br>definitiva-<br>mente en<br>desacuerdo | 2<br>en desacuerdo | 3<br>de acuerdo | 4<br>definitiva-<br>mente de<br>acuerdo |
|--------------------------------------------------------------------------------------|--------------------------------------------|--------------------|-----------------|-----------------------------------------|
| Tengo la impresión que valgo como persona, al menos en el mismo plano que los demás. |                                            |                    |                 |                                         |
| Tengo la sensación de que poseo algunas buenas cualidades.                           |                                            |                    |                 |                                         |
| En general, tiendo a pensar que soy un fracasado.                                    |                                            |                    |                 |                                         |
| Soy capaz de hacer las cosas tan bien como la mayoría de las personas.               |                                            |                    |                 |                                         |
| Siento que no tengo demasiadas cosas de las que pueda sentirme orgulloso/a           |                                            |                    |                 |                                         |
| Tengo una actitud positiva hacia mí mismo/a.                                         |                                            |                    |                 |                                         |
| En general, estoy satisfecho conmigo mismo/a.                                        |                                            |                    |                 |                                         |
| Ojalá me respetara más a mí mismo/a.                                                 |                                            |                    |                 |                                         |
| A veces pienso que no soy bueno en nada.                                             |                                            |                    |                 |                                         |
| A veces me siento realmente inútil/que no sirvo para nada.                           |                                            |                    |                 |                                         |

A continuación aparece una serie de palabras que describen sentimientos. Por favor léalos y piense cómo se siente NORMALMENTE/USUALMENTE. Después marque por favor la respuesta correcta usando las escala de 1 a 5.

|                                | 1<br>Nada o casi<br>nada | 2<br>Un poco | 3<br>Bastante | 4<br>Mucho | 5<br>Muchísimo |
|--------------------------------|--------------------------|--------------|---------------|------------|----------------|
| Comprometido con el momento /a |                          |              |               |            |                |
| Tenso/a                        |                          |              |               |            |                |
| Motivado/a                     |                          |              |               |            |                |
| Disgustado/a                   |                          |              |               |            |                |
| Enérgico/a                     |                          |              |               |            |                |
| Culpable                       |                          |              |               |            |                |
| Asustado/a                     |                          |              |               |            |                |
| Hostil                         |                          |              |               |            |                |
| Entusiasmado/a                 |                          |              |               |            |                |
| Orgulloso/a                    |                          |              |               |            |                |
| Irritable                      |                          |              |               |            |                |

|               | 1<br>Nada o casi<br>nada | 2<br>Un poco | 3<br>Bastante | 4<br>Mucho | 5<br>Muchísimo |
|---------------|--------------------------|--------------|---------------|------------|----------------|
| Alerto/a      |                          |              |               |            |                |
| Avergonzado/a |                          |              |               |            |                |
| Inspirado/a   |                          |              |               |            |                |
| Nervioso/a    |                          |              |               |            |                |
| Decidido/a    |                          |              |               |            |                |
| Atento/a      |                          |              |               |            |                |
| Miedoso/a     |                          |              |               |            |                |
| Activo/a      |                          |              |               |            |                |
| Atemorizado/a |                          |              |               |            |                |

**Abajo tenemos unas declaraciones que podrían decir varias personas. Favor de indicar si está de acuerdo con ellas, si tal vez está de acuerdo, si no está seguro o si no está de acuerdo.**

|                                                                           | 1<br>Muy en<br>desacuerdo | 2<br>Más o menos<br>en desacuerdo | 3<br>No estoy<br>seguro/a | 4<br>Más o menos<br>de acuerdo | 5<br>Muy de<br>acuerdo |
|---------------------------------------------------------------------------|---------------------------|-----------------------------------|---------------------------|--------------------------------|------------------------|
| En la mayoría de los aspectos mi vida es como quiero que sea.             |                           |                                   |                           |                                |                        |
| Las circunstancias de mi vida son buenas.                                 |                           |                                   |                           |                                |                        |
| Estoy satisfecho con mi vida.                                             |                           |                                   |                           |                                |                        |
| Hasta ahora he conseguido de la vida las cosas que considero importantes. |                           |                                   |                           |                                |                        |
| Si pudiera vivir mi vida otra vez, la repetiría tal y como ha sido.       |                           |                                   |                           |                                |                        |

**Abajo aparecen varias declaraciones. Marque por favor si está en desacuerdo o acuerdo con ellas, usando una escala 1-5, donde 1 - Muy en desacuerdo y 5 - Muy de acuerdo**

**Favor de indicar lo que realmente piensa.**

|                                                                                | 1<br>Muy en<br>desacuerdo | 2<br>Más o menos en<br>desacuerdo | 3<br>No estoy<br>seguro/a | 4<br>Más o menos de<br>acuerdo | 5<br>Muy de acuerdo |
|--------------------------------------------------------------------------------|---------------------------|-----------------------------------|---------------------------|--------------------------------|---------------------|
| Me siento que nosotros, como comunidad, estamos unidos frente a los problemas. |                           |                                   |                           |                                |                     |



|                                                                                       | 1<br>Muy en<br>desacuerdo | 2<br>Más o menos en<br>desacuerdo | 3<br>No estoy<br>seguro/a | 4<br>Más o menos de<br>acuerdo | 5<br>Muy de acuerdo |
|---------------------------------------------------------------------------------------|---------------------------|-----------------------------------|---------------------------|--------------------------------|---------------------|
| Creo que tengo intereses comunes con los demás de mi comunidad.                       |                           |                                   |                           |                                |                     |
| Yo siento apoyo moral de la gente de mi comunidad.                                    |                           |                                   |                           |                                |                     |
| El principio de ayuda mutua es dominante en nuestra comunidad.                        |                           |                                   |                           |                                |                     |
| Es fácil organizar un nuevo negocio con otros miembros de mi comunidad.               |                           |                                   |                           |                                |                     |
| Me siento más cómodo/a entre la gente de mi comunidad que entre cualquier otra gente. |                           |                                   |                           |                                |                     |
| Convivo mucho con otras personas de mi comunidad.                                     |                           |                                   |                           |                                |                     |

**Abajo aparecen varias declaraciones. Marque por favor si está en desacuerdo o acuerdo con ellas, usando una escala 1-5, donde 1 - Muy en desacuerdo y 5 - Muy de acuerdo**

**Favor de indicar lo que realmente piensa.**

|                                                          | 1<br>Muy en<br>desacuerdo | 2<br>Más o menos en<br>desacuerdo | 3<br>No estoy<br>seguro/a | 4<br>Más o menos de<br>acuerdo | 5<br>Muy de acuerdo |
|----------------------------------------------------------|---------------------------|-----------------------------------|---------------------------|--------------------------------|---------------------|
| En mi opinión, nuestra comunidad está marginalizada.     |                           |                                   |                           |                                |                     |
| Me siento relajado/a cuando viajo fuera de mi comunidad. |                           |                                   |                           |                                |                     |

|                                                                       | 1<br>Muy en<br>desacuerdo | 2<br>Más o menos en<br>desacuerdo | 3<br>No estoy<br>seguro/a | 4<br>Más o menos de<br>acuerdo | 5<br>Muy de acuerdo |
|-----------------------------------------------------------------------|---------------------------|-----------------------------------|---------------------------|--------------------------------|---------------------|
| Yo podría manejar mejor la vida en una ciudad grande o en la capital. |                           |                                   |                           |                                |                     |

**Abajo aparecen varias declaraciones. Marque por favor si está en desacuerdo o acuerdo con ellas, usando una escala 1-5, donde 1 - Muy en desacuerdo y 5 - Muy de acuerdo.**

|                                                                            | 1<br>Muy en<br>desacuerdo | 2<br>Más o menos en<br>desacuerdo | 3<br>No estoy<br>seguro/a | 4<br>Más o menos de<br>acuerdo | 5<br>Muy de acuerdo |
|----------------------------------------------------------------------------|---------------------------|-----------------------------------|---------------------------|--------------------------------|---------------------|
| Estoy contento con lo que gano.                                            |                           |                                   |                           |                                |                     |
| Estoy contento con mi trabajo.                                             |                           |                                   |                           |                                |                     |
| Yo podría ganar más dinero haciendo otro trabajo.                          |                           |                                   |                           |                                |                     |
| Quisiera que las condiciones de mi trabajo sean mejores.                   |                           |                                   |                           |                                |                     |
| Yo podría encontrar mejor trabajo fuera de mi comunidad.                   |                           |                                   |                           |                                |                     |
| Trabajar en el campo me hace más feliz que cualquier otro tipo de trabajo. |                           |                                   |                           |                                |                     |
| Los miembros de mi familia comen bien y tienen los recursos necesarios.    |                           |                                   |                           |                                |                     |

**Favor de marcar con qué frecuencia practica las siguientes actividades, usando la escala de 1 a 5 en la que 1 - nunca y 5 - muy a menudo.**

|                                              | 1<br>Nunca / No lo<br>hago | 2<br>Rara vez | 3<br>A veces | 4<br>A menudo | 5<br>Muy a menudo |
|----------------------------------------------|----------------------------|---------------|--------------|---------------|-------------------|
| Hago uso de los eventos culturales y fiestas |                            |               |              |               |                   |

|                                                                                                                                                                        | 1<br>Nunca / No lo<br>hago | 2<br>Rara vez | 3<br>A veces | 4<br>A menudo | 5<br>Muy a menudo |
|------------------------------------------------------------------------------------------------------------------------------------------------------------------------|----------------------------|---------------|--------------|---------------|-------------------|
| Participo en marchas, protestas, desfiles.                                                                                                                             |                            |               |              |               |                   |
| Ayudo como voluntario en una asociación civil, fundación, sindicato, colectivo, en la iglesia.                                                                         |                            |               |              |               |                   |
| Trabajo de forma voluntaria a favor de mi gente y mi lengua (por ejemplo doy clases del náhuatl, participo en actividades artísticas en la lengua, como canto o baile) |                            |               |              |               |                   |

**En cuáles de los eventos participaba o participa? (se puede marcar varios o ninguno)**

- ☐ Fiestas en el pueblo (organizadas por el municipio), por ejemplo fiestas patronales, Xantolo, Semana Santa, Navidad, etc.
- ☐ Fiestas comunitarias (religiosas)
- ☐ Fiestas comunitarias (no religiosas)
- ☐ Eventos organizados en mi comunidad por el municipio u otras organizaciones (e.g. capacitaciones, juntas, informes, etc.)
- ☐ Eventos escolares
- ☐ Convivios familiares (por ejemplo boda, XV años, funeral, etc.)

**Favor de indicar el nivel de su confianza en las siguientes grupos y organizaciones (en la escala de 1 a 5 explicada en la tabla).**

|                                                   | 1<br>No tengo nada<br>de confianza | 2<br>Por mayorparte<br>no confío | 3<br>Nivel promedio<br>de confianza | 4<br>Por mayor parte<br>sí confío | 5<br>Definitivamente<br>confío |
|---------------------------------------------------|------------------------------------|----------------------------------|-------------------------------------|-----------------------------------|--------------------------------|
| Autoridades de la comunidad/<br>pueblo donde vivo |                                    |                                  |                                     |                                   |                                |
| Servicios médicos                                 |                                    |                                  |                                     |                                   |                                |
| Gobierno mexicano                                 |                                    |                                  |                                     |                                   |                                |
| Vecinos u otras personas que no son indígenas     |                                    |                                  |                                     |                                   |                                |
| Miembros de mi comunidad                          |                                    |                                  |                                     |                                   |                                |
| Las demás personas indígenas                      |                                    |                                  |                                     |                                   |                                |

**Muchas gracias por participar en esta encuesta. Rellenando la encuesta y compartiendo sus experiencias y opiniones ha contribuido a la mejor comprensión de la situación actual del náhuatl. Eso va a ser muy útil para poder planear actividades que ayudarán al rescate y el uso del náhuatl más exitoso.**

Informaciones sobre el proyecto bajo el cual se realiza este estudio: El proyecto *Lengua como antídoto: vitalidad lingüística como una herramienta para construir un bienestar psicológico, la salud y un desarrollo balanceado*.

Nuestro proyecto es implementado por la Universidad de Varsovia en cooperación con organizaciones locales (Organización Cultural 'Totlahtol' en México, Colectivo Tzunhejekat en El Salvador, Asociación 'Wilamowianie', Bursa Łemkowska [Una organización de la gente del origen lemko], Asociación de Ucranianos en Polonia) y está enfocado en varios grupos minoritarios e inmigrantes en Polonia, México y El Salvador. El proyecto tiene como su objetivo explorar la relación entre el uso de la lengua, la discriminación, la salud y el bienestar. Nuestra hipótesis asume la existencia de un mecanismo positivo de la influencia del uso de la lengua materna en el funcionamiento de los individuos y grupos a los que pertenecen. Los resultados de este proyecto ayudarán a mejorar el entendimiento de las consecuencias de la pérdida de la lengua y la discriminación lingüística en el funcionamiento de los grupos minoritarios e inmigrantes, así como en toda la sociedad. Además de los estudios académicos, los resultados del proyecto incluirán soluciones prácticas y un conjunto de consejos para la política educativa, lingüística y migratoria. Este conocimiento también puede ayudar a desarrollar la sociedad cívica y apoyar a la protección de los derechos humanos en un entorno social pluricultural. El proyecto se implementa como parte del Programa Team de la Fundación para la Ciencia Polaca.

---

TEAM LCURE 2016-3/28

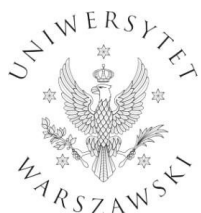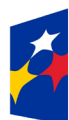

**Fundusze Europejskie**  
Inteligentny Rozwój

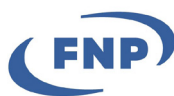

**Fundacja na rzecz Nauki Polskiej**

**Unia Europejska**  
Europejski Fundusz Rozwoju Regionalnego

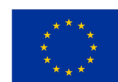

Supplement: Supplementary file 1 [file j_ijsl-2024-0138_suppl_001.pdf]
